# Supplementary material
Source: Springer Nature journal article supplement (https://www.springermedizin.de/resource/supplementary/12913_2013_3766_MOESM3_ESM.pdf/9532240)
Supplement: MOESM3 [file 9532240]

**Previous year  
statin expenditure  
(A1+B)**

**Next year statin  
expenditure  
(A2+C)**

## **Components**

**New Entrants  
Expenditure (C)**

**New Entrants Expenditure(C)**  
= New molecular entity expenditure  
+ new medicines expenditure  
+ new generic medicines expenditure  
+ others expenditure

**Core Medicines  
Expenditure (A2)**

**Core Medicines  
Expenditure (A1)**

**Core Medicines Expenditure (A1,A2)**  
= Price  $\times$  Volume  $\times$  Generic mix  
 $\times$  Pharmacological mix

**Exiting Medicines  
Expenditure (B)**

**Exiting Medicines Expenditure (B)**  
= abandoned expenditure  $\times$  (-1)
